# Altered Neurocircuitry in the Dopamine Transporter Knockout Mouse Brain

Xiaowei Zhang<sup>1</sup>, Elaine L. Bearer<sup>1,2</sup>, Benoit Boulat<sup>1</sup>, F. Scott Hall<sup>3</sup>, George R. Uhl<sup>3</sup>, Russell E. Jacobs<sup>1\*</sup>

**1** Biological Imaging Center, Beckman Institute, California Institute of Technology, Pasadena, California, United States of America, **2** Department of Pathology, University of New Mexico Health Sciences Center, Albuquerque, New Mexico, United States of America, **3** Molecular Neurobiology Branch, Intramural Research Program, National Institute on Drug Abuse, Baltimore, Maryland, United States of America

## Abstract

The plasma membrane transporters for the monoamine neurotransmitters dopamine, serotonin, and norepinephrine modulate the dynamics of these monoamine neurotransmitters. Thus, activity of these transporters has significant consequences for monoamine activity throughout the brain and for a number of neurological and psychiatric disorders. Gene knockout (KO) mice that reduce or eliminate expression of each of these monoamine transporters have provided a wealth of new information about the function of these proteins at molecular, physiological and behavioral levels. In the present work we use the unique properties of magnetic resonance imaging (MRI) to probe the effects of altered dopaminergic dynamics on meso-scale neuronal circuitry and overall brain morphology, since changes at these levels of organization might help to account for some of the extensive pharmacological and behavioral differences observed in dopamine transporter (DAT) KO mice. Despite the smaller size of these animals, voxel-wise statistical comparison of high resolution structural MR images indicated little morphological change as a consequence of DAT KO. Likewise, proton magnetic resonance spectra recorded in the striatum indicated no significant changes in detectable metabolite concentrations between DAT KO and wild-type (WT) mice. In contrast, alterations in the circuitry from the prefrontal cortex to the mesocortical limbic system, an important brain component intimately tied to function of mesolimbic/mesocortical dopamine reward pathways, were revealed by manganese-enhanced MRI (MEMRI). Analysis of co-registered MEMRI images taken over the 26 hours after introduction of Mn<sup>2+</sup> into the prefrontal cortex indicated that DAT KO mice have a truncated Mn<sup>2+</sup> distribution within this circuitry with little accumulation beyond the thalamus or contralateral to the injection site. By contrast, WT littermates exhibit Mn<sup>2+</sup> transport into more posterior midbrain nuclei and contralateral mesolimbic structures at 26 hr post-injection. Thus, DAT KO mice appear, at this level of anatomic resolution, to have preserved cortico-striatal-thalamic connectivity but diminished robustness of reward-modulating circuitry distal to the thalamus. This is in contradistinction to the state of this circuitry in serotonin transporter KO mice where we observed more robust connectivity in more posterior brain regions using methods identical to those employed here.

**Citation:** Zhang X, Bearer EL, Boulat B, Hall FS, Uhl GR, et al. (2010) Altered Neurocircuitry in the Dopamine Transporter Knockout Mouse Brain. PLoS ONE 5(7): e11506. doi:10.1371/journal.pone.0011506

**Editor:** Olivier Jacques Manzoni, INSERM U901, France

**Received:** May 5, 2010; **Accepted:** June 16, 2010; **Published:** July 9, 2010

This is an open-access article distributed under the terms of the Creative Commons Public Domain declaration which stipulates that, once placed in the public domain, this work may be freely reproduced, distributed, transmitted, modified, built upon, or otherwise used by anyone for any lawful purpose.

**Funding:** The project was funded in part by the Beckman Institute, NINDS RO1 NS062184 and RO1 NS046810 (E.L.B.), NIDA R01DA18184, and NCR R01RR021760 Mouse BIRN (R.E.J.) and, in part, by the National Institute on Drug Abuse, Intramural Research Program (G.R.U. and F.S.H.). The funders had no role in study design, data collection and analysis, decision to publish, or preparation of the manuscript.

**Competing Interests:** The authors have declared that no competing interests exist.

\* E-mail: rjacobs@caltech.edu

## Introduction

The dopamine transporter (DAT, SLC6A3) acts to terminate dopaminergic neurotransmission through reuptake of dopamine from the synaptic cleft into presynaptic neurons. Dopamine is a key neurotransmitter that can influence cognition, emotion, and movement; and many drugs exert their psychotropic effects via DAT [1,2,3,4,5]. In particular, dopamine plays an important role in the development and maintenance of addiction [6,7] where much study has been devoted to its role in reward circuitry associated with the mesolimbic and mesocortical pathways [8,9,10,11]. Dopaminergic neurons originate in the ventral tegmental area (VTA) and substantia nigra compacta (SNc), and project to areas including the prefrontal cortex [12], integrate reward circuitry with executive functions mediated by the frontal cortex. The mesocortical and mesolimbic projections are part of the brain "reward circuit," and are direct targets of psychostim-

ulant drugs of abuse. This circuitry is also implicated in mental illnesses that include schizophrenia, major depressive disorder, and attention-deficit hyperactivity disorder [13,14,15]. Interactions among these, and other, structures are complex, with numerous opportunities for feedback involving a variety of connections and neuronal types (GABAergic, glutamatergic, dopaminergic, serotonergic, cholinergic, etc.) [16,17,18]. Mouse models with specific genetic modifications in the components of these pathways allow us to probe the ramifications of well-defined alterations with an eye toward parsing endophenotypes of pathological conditions and behaviors. Studies of mice with genetic manipulations of DAT [5,19,20,21] and dopamine (DA) receptors [22,23,24,25] have provided a wealth of information about the cellular, pharmacological, physiological and behavioral consequences of these manipulations.

In this work we link the ends of the molecular-to-behavioral spectrum using a panel of magnetic resonance imaging methods to

investigate ramifications of DAT KO on mesoscopic scale neuronal circuitry and overall brain morphology in the mouse. By injecting tracer into the prefrontal cortex, we focus on the limbic cortical-ventral striatopallidal circuitry that has been implicated in a number of psychiatric disorders that are thought to involve changes in reward and executive functions mediated by the prefrontal cortex (PFC), including addiction [26,27,28,29,30,31,32]. This work parallels our previous examination of the serotonin transporter (SERT) KO mouse where significant differences in the reward circuitry were observed between SERT KO and WT mice [33]. In particular, we observed more robust connectivity between the PFC and posterior structures in SERT KO mice, using methods identical to those used in the present study.

Magnetic resonance spectroscopy (MRS), manganese enhanced MRI (MEMRI), and diffusion tensor imaging (DTI) data were obtained in DAT KO and WT mice using protocols similar to previous studies with SERT KO mice [33]. Magnetic resonance spectroscopy (MRS) of the striatum provides information about levels of several small molecules (*e.g.* glutamate, glutamine, lactate, N-acetyl-aspartate, choline, myo-inositol, taurine) that are present in the brain at millimolar or greater concentrations and can indicate disease states [34,35,36,37]. MEMRI following stereotaxic injection of nanoliter amounts of  $Mn^{2+}$  into the PFC reveals active neuronal connections that emanate from the PFC. Computational co-registration of all the 3D images allows the determination of statistical parametric maps (SPM) that identify changes on a voxel-wise basis without the need to define regions of interest. These results thus provide a comprehensive unbiased approach to identification of the sites to which  $Mn^{2+}$  is carried from the PFC injection site. SPM analysis of intensity versus time provides information about how  $Mn^{2+}$  accumulation propagates from the injection site. Tensor based morphometry [38,39] provides information about local size and shape. MRI makes possible 3D views of whole brain at 100 micron resolution, thus providing quantitative mesoscopic information about how deletion of DAT modulates metabolite levels, structure, and neuronal circuitry of executive and reward systems that are relevant to addiction.

## Results

### Injection site location and condition

Inspection of MR images recorded an hour after injection revealed that the center of each injection site fell within a 0.2 mm radius for all 16 animals. The average injection site ( $\pm$  standard deviation) was: x (lateral to the midline)  $+0.94 \pm 0.07$  mm; y (anterior-posterior with reference to Bregma)  $+1.04 \pm 0.14$  mm; z (dorsal-ventral from the brain surface)  $-1.29 \pm 0.21$  mm. Histological examination of the injection site revealed minimal damage due to the injection procedure (Figure 1), and confirmed that the appropriate location was injected. Histology also confirmed that the co-injected retrograde tracer rhodamine-dextran was observed in the expected locations, such as the amygdala, providing an additional confirmation that the injections were correctly placed [40,41] (Supplemental information Figure S1).

### Metabolite concentrations

We determined concentrations of metabolites relative to creatine plus phosphocreatine, which is assumed not to vary among mice or between the two genotypes, by probing the striatum of both genotype groups. All spectra were recorded from a 2 mm<sup>3</sup> volume centered in the striatum. Relative concentrations for each metabolite are shown in Table 1. Student's t-test

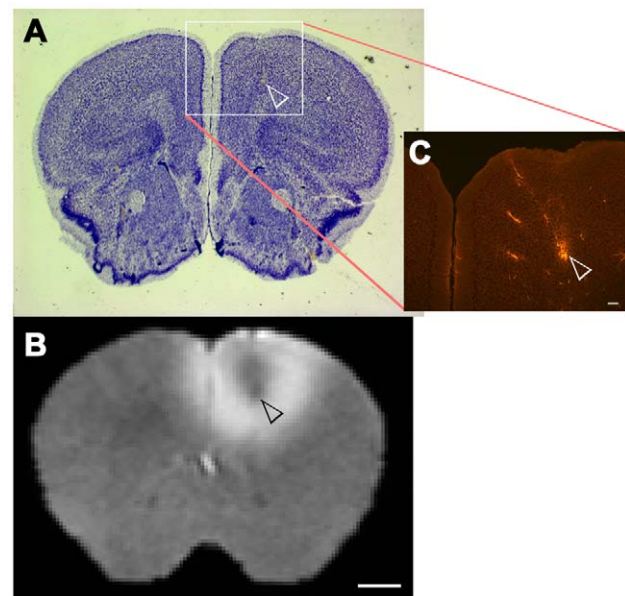

**Figure 1. Histological examination revealed minimal damage at the injection site in the prefrontal cortex.** A) Nissl-thionine stained section through the injection site; B) MRI slice from same animal as (A) in same location; C) Injection site, boxed region in (A) identified by imaging the same section shown in (A) for rhodamine-dextran fluorescence. The dextran fluorescence is easily visible against the background fluorescence from the Nissl stain. Scale bar for A and B = 1 mm. Scale bar for C = 100  $\mu$ m. doi:10.1371/journal.pone.0011506.g001

indicated that none of the metabolite levels were statistically different in the DAT KO vs WT littermates ( $p > 0.05$  in each case).

### Voxel-wise Analysis of Morphometry and $Mn^{2+}$ Accumulation

Image alignment allows voxel-wise comparisons in both human and small animal experiments [33,42,43,44,45,46,47]. Three separate statistical analyses were performed. The first, to gauge the extent of anatomical morphometric alterations resulting from the DAT KO, was done using tensor based morphometry (TBM)

**Table 1. Relative metabolite concentrations in striatum of DAT KO and WT mice are similar.**

|                    | Metabolite Ratio |                 |
|--------------------|------------------|-----------------|
|                    | DAT KO           | WT              |
| Choline            | 0.30 $\pm$ 0.08  | 0.34 $\pm$ 0.15 |
| GABA               | 0.41 $\pm$ 0.29  | 0.5 $\pm$ 0.31  |
| Glutamate          | 2.03 $\pm$ 0.79  | 1.93 $\pm$ 1.1  |
| Glutamine          | 0.14 $\pm$ 0.13  | 0.17 $\pm$ 0.15 |
| Lactate            | 0.54 $\pm$ 0.36  | 0.57 $\pm$ 0.39 |
| Myo-inositol       | 0.86 $\pm$ 0.32  | 0.83 $\pm$ 0.30 |
| N-Acetyl Aspartate | 1.0 $\pm$ 0.68   | 1.16 $\pm$ 0.6  |
| Taurine            | 0.37 $\pm$ 0.31  | 0.45 $\pm$ 0.25 |

Summary of results from MRS showing metabolite concentrations relative to creatine plus phosphocreatine.

doi:10.1371/journal.pone.0011506.t001

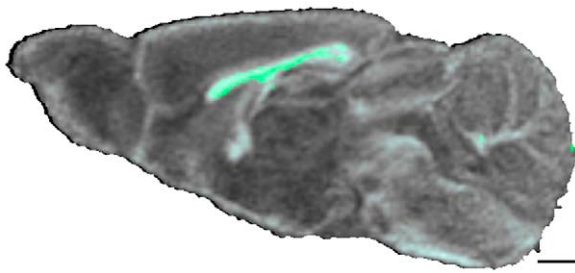

**Figure 2. Fractional anisotropy differences between DAT KO and WT.** A para-sagittal slice through the average of all WT FA data sets (grayscale background) is shown. Voxels that differ significantly between the DAT KO and WT brain scans at  $P < 0.005$  are indicated in green. Scale bar = 500  $\mu\text{m}$ . doi:10.1371/journal.pone.0011506.g002

and high contrast data sets. The second gauged the impact of DAT KO on tissue structure manifest in altered water diffusional characteristics. For this analysis, we performed image alignment and statistical parametric mapping of images of a) fractional anisotropy (FA) and b) trace of the diffusion tensor (TrD) [48]. Thirdly, to follow the movement of  $\text{Mn}^{2+}$ -induced hyperintensity in the MRI data sets, we performed image alignment and statistical parametric mapping to compare how DAT KO and WT mice differed in the time dependence of  $\text{Mn}^{2+}$  accumulation at locations distant from the injection site.

For the tensor based morphometry analysis, the structural and isotropic diffusion weighted (iDWI) data sets from DAT KO and WT mice that were obtained prior to any injections provided input. Very few voxels displayed deformation tensor indices that differed between DAT KO and WT mice. At a  $p < 0.001$  level of significance no voxels were significantly different in the logmat SPM. Only 0.8% of voxels reached this level of significance in the det SPM.

Fractional anisotropy and trace of the diffusion tensor are two rotationally-invariant indices derived from the diffusion tensor that provide information about underlying tissue characteristics [49,50,51,52,53,54,55,56]. Fractional anisotropy is a scalar measure of the diffusion anisotropy (*i.e.* the propensity of water to diffuse along, rather than perpendicular to, a nerve bundle). TrD is a measure of the orientation-independent mean diffusivity of water in the tissue. Figure 2 shows a sagittal slice through the average of all WT FA data sets (gray background). Green voxels differ significantly between the DAT KO and WT brain scans. FA measurements in the corpus callosum, adjacent external capsule and a small part of cerebellar commissure differed between the two genotypes at  $p < 0.005$ . Corpus callosum FA was  $\sim 24\%$  less in DAT KO mice compared with WT mice. The cerebellar commissure FA was  $\sim 35\%$  less in DAT KO mice. No other regions were significantly different. No differences were found in the TrD maps of DAT KO compared with WT at  $p < 0.005$ .

Figure 3 illustrates the results of two procedures: a) aligning all the DAT KO and WT *in vivo* MR images then b) calculating the minimum deformation target (MDT) at each time-point, which provides an unbiased average. The MDT images preserve the fidelity of the original images. Anatomical structures are clear and distinct; ventricles, corpus callosum, hippocampus, internal and external capsule are all easily identifiable. To provide an unbiased assessment of the whole brain, we performed statistical parametric mapping to determine the spatial extent of  $\text{Mn}^{2+}$  accumulation, detected by  $\text{Mn}^{2+}$ -induced signal intensity increase, as a function of time after injection. Color-coded volumes denote significant ( $p < 0.00025$ , uncorrected) increases in intensity from one time

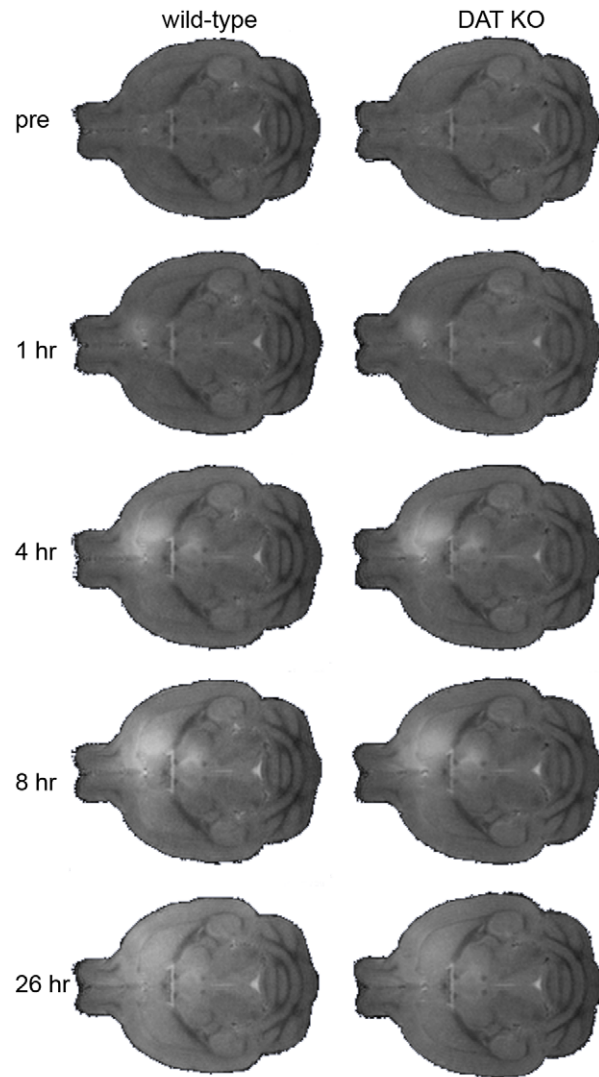

**Figure 3. The minimum deformation template (MDT) images preserve the fidelity of the original images.** The minimum deformation target (MDT) demonstrates preservation of the fidelity of the original images. Note the clarity of anatomical structures. The center of the injection site in the PFC is 1 mm above these transverse sections, which are at 2.8 mm below the brain surface. These sections illustrate the result of aligning all the DAT KO and WT *in vivo* MR images as described in Materials and Methods. Hyperintense regions indicate the location of  $\text{Mn}^{2+}$  as it moves away from the injection site. Scale bar = 1 mm. doi:10.1371/journal.pone.0011506.g003

point to the next. Representative slices from the 3 dimensional data sets are shown in Figures 4, 5 and 6. Videos showing the entire 3D data sets are available as supplementary information (Video S1, S2, S3 and S4). For clarity, WT and DAT KO data are shown separately. The earliest time period comparison is shown in green (1 hr > pre-injection), the 4 hr > 1 hr comparison is shown in red, the 8 hr > 4 hr comparison is shown in yellow, and the 26 hr > 8 hr comparison is shown in blue for both DAT KO and WT mice.

The injection site is highlighted (green). This denotes the significantly more intense signal induced by injecting  $\text{Mn}^{2+}$  into the prefrontal cortex (Figures 4, 5 and 6). As the green areas (1 hr > pre) show in the coronal (Figure 4), sagittal (Figure 5), and

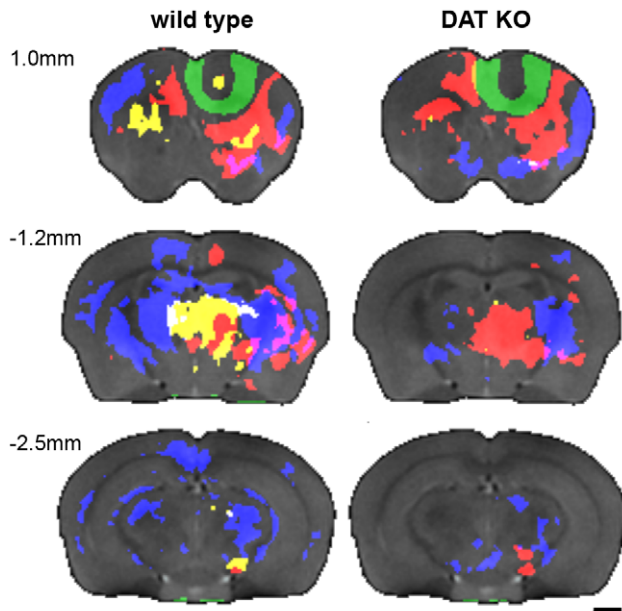

**Figure 4. Coronal sections of statistical parametric maps show the progression of  $Mn^{2+}$  accumulation over time.** Representative coronal sections through the statistical parametric maps show the progression of  $Mn^{2+}$  accumulation over time. Gray background is pre-injection MDT, while the green (1 hr > pre-injection), red (4 hr > 1 hr), yellow (8 hr > 4 hr) and blue (26 hr > 8 hr) overlays indicate areas with increased intensity ( $P < 0.00025$ ) compared to the preceding time point. Video in Supplemental Data shows the complete image data sets in for each genotype (Video S1). Slice locations are indicated relative to Bregma. Scale bars = 1 mm.

doi:10.1371/journal.pone.0011506.g004

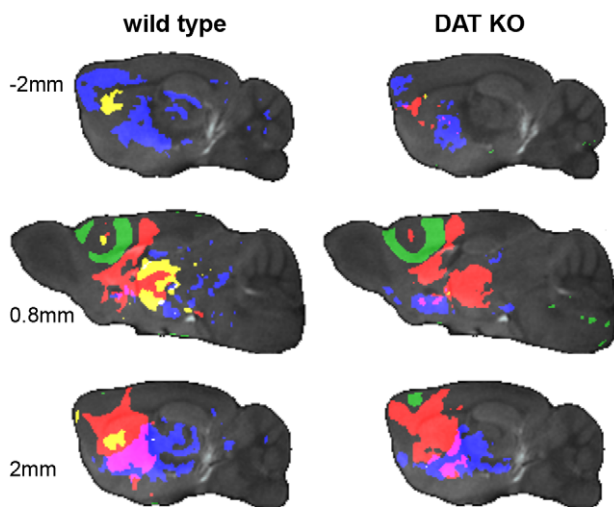

**Figure 5. Sagittal sections of statistical parametric maps show the progression of  $Mn^{2+}$  accumulation over time.** Representative sagittal sections through the statistical parametric maps show the progression of  $Mn^{2+}$  accumulation over time. Gray background is pre-injection MDT, while the green (1 hr > pre-injection), red (4 hr > 1 hr), yellow (8 hr > 4 hr) and blue (26 hr > 8 hr) overlays indicate areas with increased intensity ( $P < 0.00025$ ) compared to the preceding time point. Video in Supplemental Data shows the complete image data set for each genotype (Video S2). Slice locations are indicated relative to the midline. Scale bars = 1 mm.

doi:10.1371/journal.pone.0011506.g005

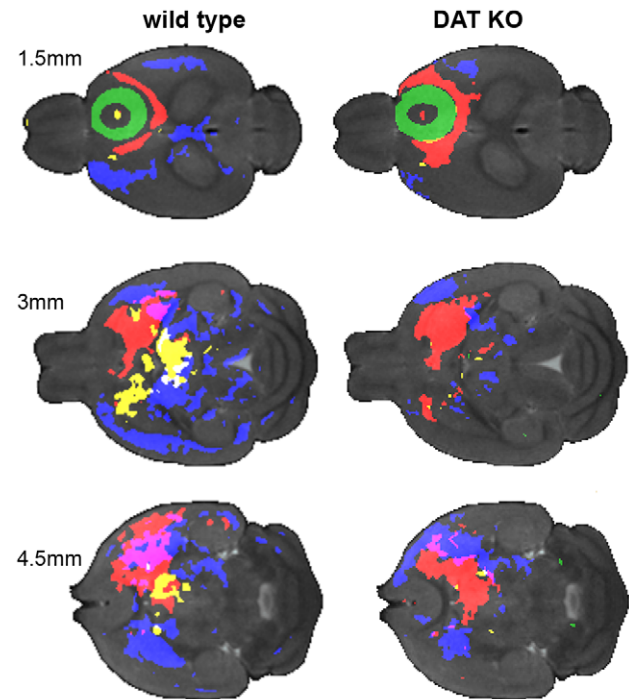

**Figure 6. Transverse sections of statistical parametric maps show the progression of  $Mn^{2+}$  accumulation over time.**

Representative transverse sections through the statistical parametric maps show the progression of  $Mn^{2+}$  accumulation over time. Gray background is pre-injection MDT, while the green (1 hr > pre-injection), red (4 hr > 1 hr), yellow (8 hr > 4 hr) and blue (26 hr > 8 hr) overlays indicate areas with increased intensity ( $P < 0.00025$ ) compared to the preceding time point. Videos in Supplemental Data show the complete image data sets for each genotype (Video S3). Slice locations are indicated relative to the brain. Scale bars = 1 mm.

doi:10.1371/journal.pone.0011506.g006

transverse (Figure 6) views,  $Mn^{2+}$  induced hyperintensities spread outward in an essentially isotropic manner immediately after the injection to provide a spheroid of hyperintensity in the MR image. This spreading is likely due to diffusion of the  $Mn^{2+}$  ion. In DAT KO mice, hyperintense volume elements are also seen along the midline immediately below the 4<sup>th</sup> ventricle (4V). To check that the intensity increase near 4V was not due to a single outlier, we repeated the Student's *t*-test parametric map analysis 8 times, each time dropping a different single sample from the analysis. The intensity increase near 4V was observed in all the comparisons.

Student's *t*-test comparisons of the 4 hr post-injection image datasets with those recorded at 1 hour reveal widespread changes (Figures 4, 5 and 6, red areas, 4 hr > 1 hr). Ventral to the injection sites, DAT KO mice display ipsilateral hyperintensity increases that expand into the ipsilateral motor cortex (M1 and M2), nucleus accumbens, globus pallidus, much of the striatum, lateral amygdala, middle anterior thalamus, and small areas farther posterior to the substantia nigra (see Table 2). Dorsal and ipsilateral to the injection site, the DAT KO mice showed increased hyperintensity in parts of the cingulate cortex, anterior striatum, and near the midline in the thalamus. WT littermates showed a similar pattern to the DAT KO mice with one exception: some hyperintensity increase was seen in the subiculum at more than 3 mm from the midline ipsilateral to the injection site.

Comparison of the 8 hr images with the 4 hr images shows little change for the DAT KO with minor increases in the ipsilateral

**Table 2.** Anatomical features highlighted by MEMRI as a function of time after PFC stereotaxic injection.

| Anatomical feature             | 1 hr      | 4 hr      | 8 hr             | 26 hr                               | SERT 25 hr            |
|--------------------------------|-----------|-----------|------------------|-------------------------------------|-----------------------|
| PFC: prefrontal cortex         | KO & WT   |           |                  |                                     |                       |
| Cortex (S, M, Cg, M, RS)       |           | KO & WT   |                  | KO (S only) & <i>WT</i>             |                       |
| CP: caudate putamen            |           | KO & WT   | WT <sub>IC</sub> | KO <sub>IC</sub> & WT <sub>IC</sub> | WT                    |
| VP: ventral pallidum           |           | KO & WT   |                  | KO <sub>IC</sub> & WT <sub>IC</sub> |                       |
| ACB: nucleus accumbens         |           | KO & WT   |                  | KO <sub>IC</sub> & WT <sub>IC</sub> | WT <sub>IC</sub>      |
| GP: globus pallidus            |           | KO & WT   |                  | KO <sub>IC</sub> & WT <sub>IC</sub> | KO & WT <sub>IC</sub> |
| AMG: amygdala                  |           | KO & WT   |                  |                                     |                       |
| TH: thalamus                   |           | KO & WT   | WT <sub>IC</sub> | KO <sub>IC</sub> & WT <sub>IC</sub> |                       |
| HY: hypothalamus LH            |           | KO & WT   |                  | <i>WT</i> <sub>IC</sub>             | KO                    |
| SI: substantia innominata      |           |           |                  |                                     | WT <sub>IC</sub>      |
| SNr: substantia nigra          |           | WT        | WT               | KO & <i>WT</i>                      | KO <sub>IC</sub>      |
| MG: medial geniculate nu       |           |           |                  | <i>WT</i>                           |                       |
| VTA: ventral tegmental area    |           |           |                  |                                     | KO                    |
| RN: red nucleus                |           |           |                  |                                     | KO                    |
| PRN: pontine reticular nucleus |           |           |                  |                                     | KO                    |
| MEnt: medial entorhinal cortex |           |           |                  | <i>WT</i> <sub>IC</sub>             |                       |
| DpMe: deep mesencephalic nu    |           |           |                  | <i>WT</i>                           |                       |
| subiculum                      |           | <i>WT</i> |                  | <i>WT</i>                           |                       |
| PAG: periaqueductal gray       |           |           |                  | <i>WT</i> <sub>IC</sub>             |                       |
| midline near 4V                | <b>KO</b> |           |                  |                                     |                       |

A synopsis of anatomical features highlighted by Mn<sup>2+</sup> MRI as a function of time after injection into the prefrontal cortex. At 26 hrs these anterior cortical areas are highlighted in the WT mouse: S, M, Cg, and RS. For comparison, the rightmost column (SERT 25 hr) shows features highlighted in our previous SERT KO study at 25 hr after Mn<sup>2+</sup> injection into the prefrontal cortex [33]. Anatomical features were identified by comparing images like those shown in Figure 4 with standard mouse brain atlases ([119] and the Allen Brain Atlas [120]). KO: DAT KO; WT: WT control; no subscript: ipsilateral; IC subscript: ipsilateral & contralateral. doi:10.1371/journal.pone.0011506.t002

accumbens and contralateral striatum. In contrast, the WT mice displayed hyperintensity increases in both the ipsilateral and contralateral striatum and thalamus, and ipsilateral substantia nigra (Figures 4, 5 and 6, yellow areas).

Between 8 hr and 26 hr, hyperintensity increases in the DAT KO mice were seen both ipsilateral and contralateral to the injection site in the striatum, accumbens, globus pallidus, and amygdala. The substantia nigra and mid thalamus had increased hyperintensities mostly ipsilateral with only small increases contralateral to the injection site (Figures 4, 5 and 6, blue areas). In the WT mice, a greater number of areas showed increases: bilaterally in the striatum, globus pallidus; parts of the somatosensory and retrosplenial granular cortices; portions of the hypothalamus and much of the ventral thalamus. Substantial enhancement was seen ipsilateral to the injection site in the substantia nigra while contralateral enhancement was seen in the cingulate cortex.

## Discussion

In this study we have used a panel of magnetic resonance methods, as well as histological confirmation, to investigate changes brought about by lifetime genetic deletion of the dopamine transporter. This study parallels an earlier examination of the serotonin transporter knockout mouse [33]. Histology confirmed that stereotaxic injection of 3 nanomoles of Mn<sup>2+</sup> with fluorescent tracers was minimally invasive and placed in the desired forebrain location. There was little evidence of toxicity, in accord with work of Canals and coworkers who found that higher amounts were required to induce significant astrogliosis and

neuronal cell death (8 and 16 nanomoles of Mn<sup>2+</sup>, respectively). [57].

Neither metabolite concentrations nor anatomical differences were found between DAT KO mice and their WT littermates. MRS detectable metabolite concentrations in the striatum were at similar levels in WT and DAT KO mice. There was thus no evidence that these animals differ from wildtype mice in neuronal viability (indicated by NAA), excitatory and inhibitory system integrity (indicated by Glu and GABA), membrane turnover (indicated by Cho), or glial volume (indicated by Tau) [35,58,59,60,61,62,63,64]. Similarly, no differences were observed for these measures between WT and SERT KO mice in our previous study [33].

Tensor based morphometry compared DAT KO and WT brains, based on *in vivo* pre-injection structural MRI and *ex vivo* iDWI data sets. These assessments also revealed few statistically significant differences between genotypes. Although DAT KO mice are known to have somewhat smaller brains than WT mice (consistent with overall smaller body size [65]) within the constraints of resolution (100 μm) and contrast of the MRI data used, the TBM analysis indicated little or no gross anatomical differences between WT and DAT KO mice. Thus, there were no differences in the size or shape of anatomical structures, no missing structures, no cerebellar or hippocampal dysmorphisms. Using a combination of manually segmented high resolution MRI and stereological analysis, Cyr and coworkers [66] observed that the anterior striatum (but not the posterior striatum) of DAT KO mice was 9% smaller as compared to wild-type mice. Further, using histological analysis they found an 18% decrease in the number of neurons in the anterior striatum of DAT KO mice as compared to

wild-type mice, while the number of glial cells was unchanged. The higher spatial resolution (43  $\mu\text{m}$ ) and somewhat better contrast to noise ratio obtained with the techniques used in the previous work make it more sensitive to small morphological changes than the current study.

The fractional anisotropy and the trace of the water diffusion tensor have been used to gain insight into changes in white matter tracts and other ordered brain structures [47,67,68]. To further characterize structural differences between DAT KO and WT mice we compared FA and TrD images of the two genotypes using statistical parametric maps. No statistically significant differences were seen in TrD maps ( $p < 0.005$ ). FA in the corpus callosum and adjacent external capsule was  $\sim 24\%$  less in the DAT KO mice compared to WT mice (see Figure 2) and a small portion of the cerebellar commissure had FA  $\sim 35\%$  less in the DAT KO. Although these are relatively small changes, lower fractional anisotropy could be a result of dysmyelination and/or less order in the neuronal structures crossing the midline in the DAT KO compared to WT mice that might indicate altered communication between the two hemispheres.

MEMRI revealed major differences in the pattern of connectivity between the prefrontal cortex and distal brain regions between the DAT KO mice and their WT littermates. The complex statistical parametric maps can be assembled into a simplified diagram of the anatomical locations occupied as  $\text{Mn}^{2+}$  induced hyperintensities move from the injection site to more distant locations in the brain (Figure 7). This schematic diagram and list of structures in Table 2 reveal that anatomical features highlighted by  $\text{Mn}^{2+}$  tracing are somewhat different in the DAT KO mice as compared to WT littermates. Statistical parametric mapping in the WT mice shows  $\text{Mn}^{2+}$  tracing to the striatum, thalamus, substantia nigra, and subiculum by 4–8 hr post injection. By 26 hr post-injection, WT mice showed widespread MRI intensity increases that encompassed the contralateral thalamus, several cortical areas (especially the somatosensory cortex), and more basal anterior structures. Thus, WT mice display  $\text{Mn}^{2+}$  accumulation reflecting the same connectivity along the cortico-mesolimbic pathway as has been assessed in classical tracing work [69,70,71,72]. In contrast to the connections from the PFC seen in WT mice, in the DAT KO mice  $\text{Mn}^{2+}$  movement was truncated at 26 hr post injection. In the DAT KO mice at 26 hr post-injection the hyperintensity distribution includes a substantially smaller subset of the WT distribution and  $\text{Mn}^{2+}$

accumulation failed to reach such posterior structures as medial entorhinal cortex, deep mesencephalic nuclei, and subiculum. Thus, deletion of the DAT gene produces alterations in mesocortical circuitry that originate from the PFC.

The time-course and spatial extent of the circuitry traced out using MEMRI in the WT littermates of DAT KO mice was substantially different than that observed for the WT littermates of SERT KO mice reported in our previous study, although the reasons for these differences are not clear [33]. The studies of these two strains use the same injection site and procedure. The genetic background is similar between the two strains, being comprised of C57BL/6J and 129Sv alleles. While we have not observed differences between C57BL/6J and 129X1/SvJ mice using MEMRI (Jacobs, unpublished results); it is likely that different combinations of C57BL/6J and 129Sv alleles have become fixed in each strain. The differences that we identify here do emphasize the necessity for littermate comparisons in transgenic studies to control for the effects of genetic background.

As in all studies employing neuronal tracers, interpretation of the results depends on the properties of the tracer.  $\text{Mn}^{2+}$  is primarily an anterograde trans-synaptic tracer that is transported via fast axonal transport and accumulates intracellularly to levels sufficient to induce increased intensity in T1-weighted MR images at locations distant from the injection site [73,74,75].  $\text{Mn}^{2+}$  is an activity dependent tracer that is taken up by active neurons, probably via voltage and/or ligand gated  $\text{Ca}^{2+}$  channels [76,77,78]. There is no known specificity of  $\text{Mn}^{2+}$  for any particular type of neuron. However, although all active neurons at the site of injection may have taken up the tracer, the initial projections observed in this work are likely to arise from the pyramidal projection neurons of the prefrontal cortex [79].

Studies of DAT KO mice have used a wide variety of behavioral, pharmacological, physiological, and ultrastructural measures to suggest that this knockout induces significant adaptive changes at the synaptic, cellular, and molecular levels. These data include region-specific changes in various dopamine receptor densities and altered responses in other neurotransmitter systems [80,81,82,83,84,85]. Thus, it is reasonable to assume that differences between DAT KO and WT mice observed in this study are due to local differences in neuronal circuitry and/or activity at both the injection site and at distal synapses. Alterations in transport or intracellular accumulation seem less likely to explain the observations made in the present report.

At the earliest time-point in our series (1 hr post-injection),  $\text{Mn}^{2+}$  accumulation is seen in the DAT KO mice on the midline bordering the base of the fourth ventricle. Such accumulation could be either a consequence of migration around the brain of  $\text{Mn}^{2+}$  leaked at the brain surface during the injection procedure or fast axonal transport through the brain parenchyma. Timing of passage around or through the cerebrum are both consistent with appearance of  $\text{Mn}^{2+}$  at this location an hour after its introduction. Within half hour of introduction into the cisterna magna of the rat, india ink tracer distributes as far forward as the olfactory bulbs and along paravascular pathways of the middle cerebral artery and its branches on the superior surface of the brain [86]. Estimates of the rate of fast axonal transport range from 2 to 16 mm/hr [87,88,89,90]. The minimum distance between the injection site and 4V is 6.5 mm, while the distance measured from the injection site through the striatum and then onto 4V is 7.5 mm. Thus, even through the longer more anatomically appropriate pathway, the rate of transport observed here is within the range of previously observed rates. Rapid  $\text{Mn}^{2+}$  accumulation in areas near 4V may indicate active connections from the prefrontal cortex to periventricular areas below 4V in the DAT KO mouse that are

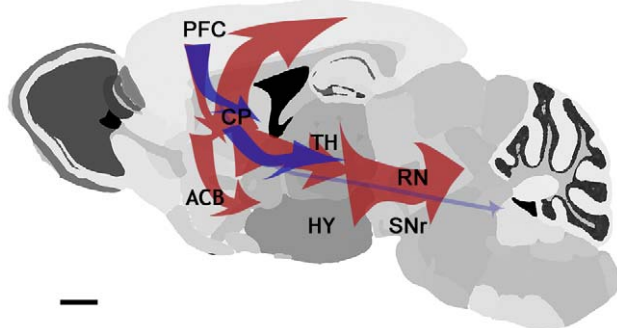

**Figure 7. Schematic representation shows PFC associated circuits are more robust in WT compared to DAT KO mice.** Major circuits delineated by MEMRI are shown. Red (WT) and blue (DAT KO) arrows in the schematic diagram indicate  $\text{Mn}^{2+}$  transport in the two genotypes. Detailed anatomy and timing of  $\text{Mn}^{2+}$  transport are shown in Table 2.

doi:10.1371/journal.pone.0011506.g007

not present, at least to the same extent, in their WT littermates. Limited resolution and contrast in the MR images and parametric maps coupled with the existence of many small nuclei in this area preclude definitive identification of the specific structures involved.

Over the course of 4 hours,  $Mn^{2+}$  is transported from the prefrontal cortex to most of the expected areas in both WT and KO mice: caudate putamen (CP), globus pallidus (GP), nucleus accumbens (NAc), thalamus (TH), and substantia nigra (SNr). These areas represent a large subset of the known connections between the neocortex and the basal ganglia of the rodent brain [69,71,72]. There was little change in  $Mn^{2+}$  accumulation between 4 hr and 8 hr in the DAT KO (note almost no yellow areas in DAT KO, Figures 4, 5 and 6). Whereas, in the WT there are substantial increases, generally ipsilateral, in the striatum, thalamus, and substantia nigra. All these structures had already seen  $Mn^{2+}$  accumulation at the earlier 4 hr time point in both genotypes. That  $Mn^{2+}$  continues to accumulate in more posterior anatomy in the WT and not the KO is further indication of more robust connectivity in the WT as compared with the KO.

In WT mice extensive differences accrued between 8 hr and 26 hr, while only incremental changes were observed in DAT KO mice. In DAT KO mice  $Mn^{2+}$  accumulation was restricted to structures observed at 4 hr post-injection with expansion within the striatum and thalamus. Whereas, in WT mice large areas both ipsilateral and contralateral to the injection site showed hyperintensity increases at the later time points. These included areas highlighted at 8 hr (e.g. striatum and thalamus – see yellow colored areas in Figures 4, 5 and 6), as well as portions of the cortex (especially somatosensory and retrosplenial cortices) and midbrain regions extending more posterior to the substantia nigra, medial geniculate nuclei, medial entorhinal cortex and subiculum. The lack of widespread  $Mn^{2+}$ -induced hyperintensity in DAT KOs observed 26 hr post-injection indicates a similarly diminished general communication among distant brain regions in these mice compared to WT littermates. Less robust connectivity to more posterior areas would be a natural consequence of cortical ‘hypofrontality’ and/or a consequence of poorer communication from the striatum. Interestingly, chronic exposure to any of several drugs of abuse is associated with reduced activity in the frontal cortex [7,11,91,92]. The previously observed decrease in the number of anterior striatal neurons in the DAT KO mouse [66] would be expected to diminish connectivity to structures functionally downstream of the striatum, as was observed here. As the PFC and striatum use, or receive, projections from a number of signaling systems (dopaminergic, glutamatergic, gabaergic, serotonergic, noradrenergic, etc.) [72,93,94,95,96,97], widespread differences in  $Mn^{2+}$  accumulation at 26 hr between DAT KO and WT mice are likely to represent of indirect consequences of alterations in dopaminergic signaling induced directly by deletion of DAT.

By 26 hr,  $Mn^{2+}$  had sufficient time to cross many synapses and to be transported throughout the mouse brain [98]. Thus, the  $Mn^{2+}$  induced hyperintensity at 26 hr may have been a reflection of local activity as well as connectivity, complimenting PET  $^{18}F$ FDG uptake studies. Recent PET  $^{18}F$ FDG uptake studies in DAT KO mice indicate differential brain metabolism levels in KO versus WT mice in both the resting state and after acute cocaine exposure [92]. DAT KO mice have marginally higher baseline  $^{18}F$ FDG uptake in the thalamus and cerebellum compared to WT mice, while all other areas examined had similar levels of uptake. Acute cocaine exposure decreased  $^{18}F$ FDG uptake in the olfactory bulb, motor cortex, striatum, hippocampus, TH, and cerebellum in WT mice, while in DAT KO mice only the TH showed a significant decrease in glucose metabolism. In comparison,  $Mn^{2+}$

accumulation from 8 hr to 26 hr observed in WT mice was substantially more widespread (e.g. cortical regions, ipsilateral and contralateral TH, and periaqueductal gray areas) than that observed in DAT KO mice. When basal activity differences are conflated with connectivity differences, as they are in MEMRI, it is not surprising that somewhat different patterns emerge in the MEMRI brain scans compared to techniques that measure basal metabolism only, such as  $^{18}F$ FDG uptake in PET scans. Nonetheless, these imaging results, taken together, indicate that the DAT KO brain is both qualitatively and quantitatively different than the corresponding WT brain, with substantial effects on the reward pathways that may involve several of the monoamine systems.

The DAT KO mouse has been suggested to constitute an animal model of several disorders thought to involve hyperdopaminergic function, including schizophrenia [2,99], which would be consistent with a ‘‘hypofrontal’’ phenotype. To some extent this is a consequence of altered prefrontal/striatal dopamine function that arises from the DAT KO. Although basal extracellular dopamine levels in the striatum are greatly enhanced in DAT KO mice compared to WT mice, this is not observed in the PFC [100]. This circumstance results in a shift in the balance of dopaminergic activity, as well as, it would seem, the overall balance of activity within other portions of the reward circuitry. Thus, there are substantial differences in Fos-like immunoreactivity between DAT KO and WT mice after psychostimulant administration. DAT KO mice show substantially reduced activation of frontal areas [101] as well as a ‘‘hypofrontal’’ phenotype observable in PET imaging [92]. Some behavioral changes are also consistent with this overall picture. For instance, DAT KO mice have deficits in pre-pulse inhibition of startle that can be ameliorated by dopamine D2 receptor antagonists [102]. How valid a model the DAT KO mouse is as an animal model of schizophrenia remains to be seen, but, in any case, several other findings support the overall picture described above. The most overt consequence of the DAT KO is locomotor hyperactivity [103,104] that has been described as constituting an animal model of attention deficit hyperactivity disorder [99]. Interestingly, both hyperactivity and impairments of pre-pulse inhibition of startle in DAT KO mice can be reversed by stimulant drugs such as cocaine, amphetamine and methylphenidate [105,106]. Indeed, in each case the actions of the psychostimulants were in the opposite direction to that observed in WT mice: hyperactivity and attentional impairments in WT mice, and reduced hyperactivity and amelioration of attentional deficits in DAT KO mice. Importantly, it was shown that the effects of these drugs on pre-pulse inhibition in DAT KO mice were actually mediated by NET blockade [106], which presumably acts selectively in the prefrontal cortex (but not the striatum) to elevate dopamine levels and restore the balance of cortical and striatal dopamine function. Overall, this literature is consistent with the present results which indicate reduced fronto-cortical activity in DAT KO mice, indicating that many DAT KO phenotypes are not simply the result of increased DA function, but of the consequent changes in activity within the overall circuitry of which the dopaminergic projections are just one part.

In this study we employed a panel of magnetic resonance methods to probe the effects of lifelong deletion of DAT in a mouse model system. As detected by magnetic resonance methods, no significant changes in metabolite levels or morphology were observed in DAT KO mice. In contrast, MEMRI revealed that DAT KO mice had extensive alterations in the executive portions of reward circuitry that are intimately involved in addiction, as well as other psychiatric conditions. Connections originating in the prefrontal cortex were significantly truncated in the DAT KO

mice. The changes we observed are consistent with cortical ‘hypofrontality’, described in behavioral, pharmacological and neurochemical studies of DAT KO mice. In contrast to the present results, our previous study of the SERT KO mouse revealed a generally more robust cortico-limbic circuit compared to WT mice. These studies indicate that a panel of MR imaging methods combined with statistical parametric mapping analyses is a powerful tool for endophenotyping the pathological manifestations of genetic alterations in executive/reward circuitry.

## Materials and Methods

### Animals

The line of DAT KO mice used in these experiments has been described previously [104]. Eight DAT KO mice and eight WT littermates were used in this study. Mice were mixed male and female subjects between the ages of 18 and 24 weeks.

### Ethics Statement

All protocols involving animals in this work were approved by the Institutional Animal Care and Use Committee of the California Institute of Technology.

### Stereotaxic Injections

The stereotaxic injection procedure was similar to that employed by Bearer et al [107]. Mice were anesthetized with ketamine/xylazine (7.5 mg ketamine plus 5 mg xylazine per kg, i.p.) and placed in a stereotaxic frame (Kopf Instruments, Tujunga, CA). 5 nl of 600 mM MnCl<sub>2</sub> with 0.5 mg/ml rhodamine dextran-amine (3k) (Molecular Probes/Invitrogen, Eugene, OR) was injected unilaterally into the right prefrontal cortex (coordinates  $x$  -0.8 mm (from the midline),  $y$  +1.9 mm (from Bregma),  $z$  1.8 mm (from the dorsal surface of the brain) [108]) over 5 minutes using a quartz micropipette (1 mm OD quartz capillary pulled to approximately 20 micron OD tip) guided by computer-assisted stereotaxic injector (myNeuroLab.com, Richmond, IL). The animal was immediately placed in the MR scanner under 0.8% isoflurane anesthetic.

### Preparation for *ex vivo* imaging

Within 10 days after *in vivo* imaging, animals were sacrificed and brains fixed via transcardiac perfusion with 4% paraformaldehyde (PFA) as previously described [47]. After overnight rocking in 4% PFA at 4°C the mouse head was cleaned of skin, lower jaw, ears and cartilaginous nose tip and then rocked in 50 ml 0.01% sodium azide in PBS for 7 days at 4°C. The head was then transferred to a 5 mM solution of gadoteridol (Prohance®, Bracco Diagnostics Inc, Princeton NJ) and 0.01% sodium azide in PBS and rocked for 7 days at 4°C prior to MR imaging.

### Magnetic Resonance Imaging and spectroscopy

Each animal was scanned before the stereotaxic injection; and beginning at 0:54±0:13, 4:23±0:09, 8:13±0:06, and 25:45±0:48 hours post injection. Times are averages over all animals ± standard deviation. We use the midpoint of each 40 minute scan as the “scan time” and for convenience call these the 1 hr, 4 hr, 8 hr, and 26 hr time points. An 11.7 T 89 mm vertical bore Bruker BioSpin Avance DRX500 scanner (Bruker BioSpin Inc, Billerica, MA) equipped with a Micro2.5 gradient system was used to acquire all mouse brain images and spectroscopic data with a 35 mm linear birdcage radio frequency (RF) coil. For *in vivo* imaging the animal’s head was secured in a Teflon stereotaxic unit within the RF coil to minimize movement and to aid in reproducible placement. Temperature and respiration were

continuously monitored during data acquisition and remained within normal ranges. We employed a 3D RARE imaging sequence [109] with RARE factor of 4, 4 averages, TR/TE<sub>eff</sub> = 250 ms/12 ms; matrix size of 160×128×78; FOV 16 mm ×12.8 mm ×7.8 mm; yielding 100 μm isotropic voxels with 40 minute scan time.

All *in vivo* mouse brain magnetic resonance spectroscopy (MRS) experiments were conducted using Point Resolved Spectroscopy (PRESS) [110] with a short echo time TE of 7.267 ms, recycle time of 2.3 seconds, a spectral width of 7 KHz, 4000 data points in each free induction decay signal (FID), and 128 averages. The sequence was preceded by a VAPOR water suppression module [111] interleaved with outer volume saturation. Optimized second order shimming was done with the FastMap routine [112] in a 5 mm cube centered in the striatum. The PRESS spectra were then recorded inside a 2 mm<sup>3</sup> volume (8 μl) at the center of the volume used for shimming.

For *ex vivo* imaging, two intact heads were secured in a Teflon® holder and submerged in perfluoropolyether (Fomblin®, Solvay Solexis, Inc, Thorofare, NJ) within a 50 ml vial and imaged. The ambient bore temperature was maintained at 4°C by thermostatically controlled airflow. Diffusion weighted images were acquired using a conventional pulsed-gradient spin echo (PGSE) sequence (TR/TE = 300 ms/11.9 ms, 256×150×120 matrix, 25.6 mm ×15 mm ×12 mm FOV, 100 μm isotropic voxel size, 1 average, δ=3 ms, Δ=5.2 ms, Gd=1125 mT/m, nominal b-factor = 3370 s/mm<sup>2</sup>). An optimized six point icosahedral encoding scheme [113] was used for diffusion weighted acquisitions with a single un-weighted reference image for a total imaging time of 14.5 hours.

### Histology

After DTI imaging, 5 brains were selected for histological examination, 3 DAT KO and 2 WT littermates. Prior to processing, each brain was released from the skull, post-fixed 1–3 days, and then sent to Neuroscience Associates (NSA, Knoxville, TN) for gelatin embedding and frozen sectioning as described [33]. All 5 brains were embedded in a single gelatin block and sectioned in register at 30 μm thickness. Each 12th section was stained for Nissl-Thionine and an adjacent section mounted in DAPI-containing anti-quench and mounted for fluorescence microscopy of the co-injected rhodamine dextran. Sections were imaged on a Zeiss V8 stereoscope equipped with an AxioCam running AxioVision 4.8, bright and dark-field illumination and three fluorescent filter cubes for DAPI, TRITC, and FITC on a Zeiss Axioscope Z1 with an MRM and HRC AxioCam running AxioVision 4.6 software and having a similar brightfield and fluorescence capabilities.

### Image Alignment and Statistical Parametric Mapping

Pre- and post-Mn<sup>2+</sup> injection MR images were skull-stripped using the Brain Surface Extractor (BSE) within BrainSuite2 [114] to remove all non-brain material. Inaccuracies were corrected by manually editing the masks using BrainSuite 2. After skull-stripping, field inhomogeneities were corrected using the N3 method [115] and each was scaled to the mode of its intensity histogram [107,116,117]. A minimum deformation target (MDT) was produced from the pre-injection images as described [33,118]. The pre-injection images were then warped into this MDT as described [33] and the post-injection images were linearly aligned (12 parameter model) to the pre-injection images using Align-linear, followed by application of the polynomial warp field used to transform that sample’s pre-injection image into the MDT. Final images were blurred with a 0.3 mm Gaussian kernel and a paired



Student's t-test was used to determine which voxels increased in intensity when comparing one time point to the next. Similar processing was used to compare rotationally invariant indices derived from DTI datasets, except that an unpaired Student's t-test was used to compare DAT KO and WT mice. Parametric maps of voxels with statistically significant changes in intensity were created to display the results and to correlate increases with underlying anatomy [107]. Anatomy was determined with reference to Hoff et al. [119] and the Allen Brain Atlas [120] (<http://www.brain-map.org/welcome.do>).

### Tensor Based Morphometry

A deformation field analysis implemented by Thompson and coworkers [121] was used to analyze whether MRI scans of the DAT KO mice differed anatomically from WT mouse brain scans, as described [33]. Structural RARE and iDWI data were mapped to their respective MDTs, the deformation field needed to warp each image to the WT pre-injection structural or iDWI MDT determined, and p-value maps calculated noting statistical significance of differences in the deformation tensors of the two cohorts as measured by comparisons of the determinant of the deformation tensor and matrix logarithm of the determinant at each voxel [39,48,117,122,123].

### Determination of relative metabolite concentrations

For each mouse brain the spectrum of the relative amount of metabolites inside the experimental PRESS volume was quantified using the QUEST (quantitation based on quantum estimation) module [124] available inside the Java Magnetic Resonance User Interface (JMRUI) package [125]. Spin parameters (number of spins, chemical shifts, J-couplings) were obtained from Govindaraju [126]. Metabolite amounts obtained by the QUEST were normalized to creatine plus phosphocreatine.

### Diffusion tensor image construction

Reconstruction of the apparent diffusion-weighted images included spatial radial Gaussian filtering (0.25 voxel width) to smooth the co-registration cost-function and improve the SNR of all subsequent calculations. The apparent diffusion tensor was calculated conventionally by inversion of the encoding b-matrix. The b-matrix for each diffusion encoding was determined by numerical simulation of the pulse sequence k-space trajectory in order to account for gradient cross-terms [127]. Eigenvalues, eigenvectors, tensor trace and fractional anisotropy were calculated conventionally using built-in and custom Matlab functions (The Mathworks Inc., Natick MA). The six diffusion weighted images were averaged to generate a high SNR isotropic diffusion weighted image (iDWI). Diffusion tensor images (and associated images of eigenvalue,  $\lambda_i$ ; trace, TrD; and fractional anisotropy, FA) were placed into the same space for voxel-wise comparisons using the methods outlined above for *in vivo* MR images.

### Rendering

Visualization of the MR images and statistical parametric maps was performed with ResolveRT4 (Mercury Computer Systems, Inc., Hudson, NH) and MRIcro [128].

### Supporting Information

**Figure S1** Rhodamine-dextran is transported to the amygdala in a wild type animal 16 days after injection in the PFC. The sections was mounted, stained with DAPI for nuclei and imaged for rhodamine and DAPI fluorescence. Alternate sections were Nissl stained. A) Rhodamine-dextran appears in the red channel

in neurons of the amygdala and not in other areas in this part of the brain. The DAPI-stained nuclei are shown in blue. B) Nissl-stained section adjacent to the section shown in A) which overlaps the boxed area. These results demonstrate that the location of the injection site was appropriate for the introduction of tracer into the expected forebrain-midbrain pathway. The location of the rhodamine fluorescence is consistent with rhodamine-dextran having arrived via retrograde transport along the axons to the neuronal cell body. Scale bar = 100  $\mu$ m.

Found at: doi:10.1371/journal.pone.0011506.s001 (3.23 MB TIF)

**Video S1** Coronal sections through the statistical parametric maps show the progression of Mn<sup>2+</sup> accumulation over time. Gray background is pre-injection MDA, while the colored overlays denote areas with increased intensity ( $P < 0.00025$ ) at 1 hr (green), 4 hr (red), 8 hr (yellow), and 24 hr (blue) compared to the preceding time point. Video shows consecutive sections in the coronal directions for the DAT knockout and wild-type cohorts. Slice locations are shown at the bottom right in millimeters with respect to Bregma. Scale bar = 1 mm.

Found at: doi:10.1371/journal.pone.0011506.s002 (7.36 MB MOV)

**Video S2** Sagittal sections through time-series statistical parametric maps. Gray background is pre-injection MDA, while the colored overlays denote areas with increased intensity ( $P < 0.00025$ ) at 1 hr (green), 4 hr (red), 8 hr (yellow), and 24 hr (blue) compared to the preceding time point. Video shows consecutive sections in the sagittal directions for the DAT knockout and wild-type cohorts. Slice locations are shown at the bottom right in millimeters with respect to midline. Scale bar = 1 mm.

Found at: doi:10.1371/journal.pone.0011506.s003 (6.34 MB MOV)

**Video S3** Transverse sections through time-series statistical parametric maps. Gray background is pre-injection MDA, while the colored overlays denote areas with increased intensity ( $P < 0.00025$ ) at 1 hr (green), 4 hr (red), 8 hr (yellow), and 24 hr (blue) compared to the preceding time point. Video shows consecutive sections in the transverse directions for the DAT knockout and wild-type cohorts. Slice locations are shown at the bottom right in millimeters with respect to the brain surface. Scale bar = 1 mm.

Found at: doi:10.1371/journal.pone.0011506.s004 (5.69 MB MOV)

**Video S4** Three dimensional rotations of statistical parametric maps. Three dimensional rotations of statistical parametric maps with Gray background is pre-injection MDA, while the colored overlays denote areas with increased intensity ( $P < 0.00025$ ) at 1 hr (green), 4 hr (red), 8 hr (yellow), and 24 hr (blue) compared to the preceding time point.

Found at: doi:10.1371/journal.pone.0011506.s005 (9.44 MB MOV)

### Acknowledgments

We thank Mike Tyszka at Caltech for creation and implementation of the DTI routines; Grace Cai and Davit Janvetyan for assistance with image processing; and the Laboratory for NeuroImaging at UCLA for invaluable help with the LONI pipeline and TBM analysis.

### Author Contributions

Conceived and designed the experiments: REJ. Performed the experiments: XZ ELB BB. Analyzed the data: ELB BB FSH GRU REJ. Contributed reagents/materials/analysis tools: XZ ELB FSH GRU. Wrote the paper: REJ. Revised manuscript critically for important intellectual content: XZ ELB BB FSH GRU.

## References

- Sidhu A, Laruelle M, Vernier P, Grignon S (2003) Dopamine Receptors and Transporters: Function, Imaging, and Clinical Implication. New York, NY: Marcel Dekker Inc. 776 p.
- Gainetdinov R (2008) Dopamine transporter mutant mice in experimental neuropharmacology. *Naunyn-Schmiedeberg's Archives of Pharmacology* 377: 301–313.
- Koob GF, Volkow ND (2010) Neurocircuitry of Addiction. *Neuropsychopharmacology* 35: 217–238.
- Amara SG, Sonders MS (1998) Neurotransmitter transporters as molecular targets for addictive drugs. *Drug and Alcohol Dependence* 51: 87–96.
- Uhl GR (2003) Dopamine transporter: Basic science and human variation of a key molecule for dopaminergic function, locomotion, and parkinsonism. *Movement Disorders* 18: S71–S80.
- Franken IHA, Booij J, van den Brink W (2005) The role of dopamine in human addiction: From reward to motivated attention. *European Journal of Pharmacology* 526: 199–206.
- Volkow ND, Fowler JS, Wang GJ, Swanson JM (2004) Dopamine in drug abuse and addiction: results from imaging studies and treatment implications. *Mol Psychiatry* 9: 557–569.
- Jones S, Bonci A (2005) Synaptic plasticity and drug addiction. *Current Opinion in Pharmacology* 5: 20–25.
- Bonci A, Bernardi G, Grillner P, Mercuri NB (2003) The dopamine-containing neuron: maestro or simple musician in the orchestra of addiction? *Trends in Pharmacological Sciences* 24: 172–177.
- Robbins TW, Everitt BJ (2002) Limbic-Striatal Memory Systems and Drug Addiction. *Neurobiology of Learning and Memory* 78: 625–636.
- Nestler EJ (2005) Is there a common molecular pathway for addiction? *Nat Neurosci* 8: 1445–1449.
- Gerfen CR (2004) Basal Ganglia. In: Paxinos G, ed. *The Rat Nervous System* 3rd Edition. Sydney: Elsevier Academic Press. pp 455–508.
- Snyder SH (2006) Dopamine Receptor Excess and Mouse Madness. *Neuron* 49: 484–485.
- Chen J, Lipska BK, Weinberger DR (2006) Genetic Mouse Models of Schizophrenia: From Hypothesis-Based To Susceptibility Gene-Based Models. *Biological Psychiatry* 59: 1180–1188.
- Comings DE, Blum K (2000) Reward deficiency syndrome: genetic aspects of behavioral disorders. *Prog Brain Res* 126: 325–341.
- Floresco SB, Tse MT (2007) Dopaminergic Regulation of Inhibitory and Excitatory Transmission in the Basolateral Amygdala-Prefrontal Cortical Pathway. *J Neurosci* 27: 2045–2057.
- Everitt BJ, Robbins TW (2005) Neural systems of reinforcement for drug addiction: from actions to habits to compulsion. *Nat Neurosci* 8: 1481–1489.
- Drevets WC (2007) Orbitofrontal Cortex Function and Structure in Depression. *Annals of the New York Academy of Sciences* 1121: 499–527.
- Gainetdinov RR, Sotnikova TD, Caron MG (2002) Monoamine transporter pharmacology and mutant mice. *Trends in Pharmacological Sciences* 23: 367–373.
- Carson RP, Robertson D (2002) Genetic manipulation of noradrenergic neurons. *J Pharmacol Exp Ther* 301: 410–417.
- Caron MG (1996) Molecular biology.2. A dopamine transporter mouse knockout. *American Journal of Psychiatry* 153: 1515–1515.
- Chen L, Zhuang XX (2003) Transgenic mouse models of dopamine deficiency. *Annals of Neurology* 54: S91–S102.
- Ariano MA, Drago J, Sibley DR, Levine MS (1998) Striatal excitatory amino acid receptor subunit expression in the D-1A-dopamine receptor-deficient mouse. *Developmental Neuroscience* 20: 237–241.
- Spanagel R, Sanchis-Segura C (2003) The use of transgenic mice to study addictive behavior. *Clinical Neuroscience Research* 3: 325–331.
- Wong JYF, Clifford JJ, Massalas JS, Finkelstein DI, Horne MK, et al. (2003) Neurochemical changes in dopamine D1, D3 and D1/D3 receptor knockout mice. *European Journal of Pharmacology* 472: 39–47.
- Groenewegen HJ, Uylings HBM, Uylings HBM, van Eden GG, de Bruin JPC, et al. (2000) The prefrontal cortex and the integration of sensory, limbic and autonomic information. *Progress in Brain Research*: Elsevier. pp 3–28.
- Van Eden CG, Buijs RM, HBM Uylings GGvEJPCdBMGPF, Pennartz CMA (2000) Functional neuroanatomy of the prefrontal cortex: autonomic interactions. *Progress in Brain Research*: Elsevier. pp 49–62.
- Hurley KM, Herbert H, Moga MM, Saper CB (1991) Efferent Projections of the Infralimbic Cortex of the Rat. *Journal of Comparative Neurology* 308: 249–276.
- Miller EK (1999) The Prefrontal Cortex: Complex Neural Properties for Complex Behavior. *Neuron* 22: 15–17.
- Tanji J, Hoshi E (2001) Behavioral planning in the prefrontal cortex. *Current Opinion in Neurobiology* 11: 164–170.
- Haber SN, Calzavara R (2009) The cortico-basal ganglia integrative network: The role of the thalamus. *Brain Research Bulletin* 78: 69–74.
- Heidbreder CA, Groenewegen HJ (2003) The medial prefrontal cortex in the rat: evidence for a dorso-ventral distinction based upon functional and anatomical characteristics. *Neuroscience & Biobehavioral Reviews* 27: 555–579.
- Bearer EL, Zhang X, Janvelyan D, Boulat B, Jacobs RE (2009) Reward circuitry is perturbed in the absence of the serotonin transporter. *NeuroImage* 46: 1091–1104.
- Pouwels PJW, Frahm J (1998) Regional Metabolite Concentrations in Human Brain as Determined by Quantitative Localized Proton MRS. *Magn Reson Med* 39: 53–60.
- Lyoo IK, Renshaw PF (2002) Magnetic resonance spectroscopy: Current and future applications in psychiatric research. *Biological Psychiatry* 51: 195–207.
- Tkac I, Henry P-G, Andersen P, Keene CD, Low WC, et al. (2004) Highly resolved in vivo 1H NMR spectroscopy of the mouse brain at 9.4 T. *Magnetic Resonance in Medicine* 52: 478–484.
- Sanacora G, Rothman D, Krystal JH (1999) Applications of Magnetic Resonance Spectroscopy to Psychiatry. *Neuroscientist* 5: 192–196.
- Lau JC, Lerch JP, Sled JG, Henkelman RM, Evans AC, et al. (2008) Longitudinal neuroanatomical changes determined by deformation-based morphometry in a mouse model of Alzheimer's disease. *NeuroImage* 42: 19–27.
- Brun CC, Lepore N, Pennec X, Lee AD, Barysheva M, et al. (2009) Mapping the regional influence of genetics on brain structure variability — A Tensor-Based Morphometry study. *NeuroImage* 48: 37–49.
- McDonald AJ (1991) Organization of Amygdaloid Projections to the Prefrontal Cortex and Associated Striatum in the Rat. *Neuroscience* 44: 1–14.
- Shinonaga Y, Takada M, Mizuno N (1994) Topographic Organization of Collateral Projections from the Basolateral Amygdaloid Nucleus to Both the Prefrontal Cortex and Nucleus-Accumbens in the Rat. *Neuroscience* 58: 389–397.
- Mechelli A, Friston KJ, Frackowiak RS, Price CJ (2005) Structural Covariance in the Human Cortex. *J Neurosci* 25: 8303–8310.
- Lee E-F, Jacobs RE, Dinov I, Loew A, Toga AW (2005) Standard atlas space for C57BL/6J neonatal mouse brain. *Anat Embryol* 210: 245–263.
- Hammers A, Allom R, Koeppe MJ, Free SL, Myers R, et al. (2003) Three-dimensional maximum probability atlas of the human brain, with particular reference to the temporal lobe. *Human Brain Mapping* 19: 224–247.
- Kassubek J, Juengling FD, Kioschies T, Henkel K, Karitzky J, et al. (2004) Topography of cerebral atrophy in early Huntington's disease: a voxel based morphometric MRI study. *Journal of Neurology Neurosurgery and Psychiatry* 75: 213–220.
- Toga AW, Mazziotta JC, eds (2002) *Brain Mapping: The Methods* 2nd Ed. San Diego: Academic Press. 877 p.
- Tyszka JM, Readhead C, Bearer E, Pautler R, Jacobs RE (2006) Statistical Diffusion Tensor Histology Reveals Regional Demyelination Effects in the Shiverer Mouse Mutant. *NeuroImage* 2006: 1058–1065.
- Verma R, Mori S, Shen DG, Yarowsky P, Zhang JY, et al. (2005) Spatiotemporal maturation patterns of murine brain quantified by diffusion tensor MRI and deformation-based morphometry. *Proceedings of the National Academy of Sciences of the United States of America* 102: 6978–6983.
- Basser PJ (1995) Inferring microstructural features and the physiological state of tissues from diffusion-weighted images. *NMR Biomed* 8: 333–344.
- Pfefferbaum A, Sullivan E, Hedeus M, Adalsteinsson E, Lim K, et al. (2000) In vivo detection and functional correlates of white matter microstructural disruption in chronic alcoholism. *Alcoholism-Clinical and Experimental Research* 24: 1214–1221.
- Alexander DC, Pierpaoli C, Basser PJ, Gee JC (2001) Spatial transformations of diffusion tensor magnetic resonance images. *IEEE Transactions on Medical Imaging* 20: 1131–1139.
- Mori S, Itoh R, Zhang JY, Kaufmann WE, van Zijl PCM, et al. (2001) Diffusion tensor imaging of the developing mouse brain. *Magn Reson Med* 46: 18–23.
- Song SK, Sun SW, Ramsbottom MJ, Chang C, Russell J, et al. (2002) Demyelination revealed through MRI as increased radial (but unchanged axial) diffusion of water. *NeuroImage* 17: 1429–1436.
- LeBihan D (1995) Molecular diffusion, tissue microdynamics and microstructure. *NMR Biomed* 8: 375–386.
- van Doorn A, Bovendeerd PH, Nicolay K, Drost MR, Janssen JD (1996) Determination of muscle fibre orientation using Diffusion-Weighted MRI [published erratum appears in *Eur J Morphol* 1996 Nov;34(4):325]. *Eur J Morphol* 34: 5–10.
- Papadakis N, Xing D, Houston G, Smith J, Smith M, et al. (1999) A study of rotationally invariant and symmetric indices of diffusion anisotropy. *Magnetic Resonance Imaging* 17: 881–892.
- Canals S, Beyerlein M, Keller AL, Murayama Y, Logothetis NK (2008) Magnetic resonance imaging of cortical connectivity in vivo. *NeuroImage* 40: 458–472.
- Rudin M, Beckmann N, Mir A, Sauter A (1995) In-vivo magnetic-resonance-imaging and spectroscopy in pharmacological research - assessment of morphological, physiological and metabolic effects of drugs. *Eur J Pharm Sci* 3: 255–264.
- Hetherington HP, Pan JW, Chu WJ, Mason GF, Newcomer BR (1997) Biological and clinical MRS at ultra-high field. *NMR Biomed* 10: 360–371.
- Morris PG (1999) Magnetic resonance imaging and magnetic resonance spectroscopy assessment of brain function in experimental animals and man. *J Psychopharmacol* 13: 330–336.

61. Brian Ross SB (2001) Magnetic resonance spectroscopy of the human brain. *The Anatomical Record* 265: 54–84.
62. Rothman DL, Behar KL, Hyder F, Shulman RG (2003) In vivo NMR studies of the glutamate neurotransmitter flux and neuroenergetics: Implications for brain function. *Annual Review of Physiology* 65: 401–427.
63. Dedeoglu A, Choi J-K, Cormier K, Kowall NW, Jenkins BG (2004) Magnetic resonance spectroscopic analysis of Alzheimer's disease mouse brain that express mutant human APP shows altered neurochemical profile. *Brain Research* 1012: 60–65.
64. Marjanska M, Curran GL, Wengenack TM, Henry P-G, Bliss RL, et al. (2005) Monitoring disease progression in transgenic mouse models of Alzheimer's disease with proton magnetic resonance spectroscopy. *Proceedings of the National Academy of Sciences* 102: 11906–11910.
65. Bosse R, Fumagalli F, Jaber M, Giros B, Gainetdinov RR, et al. (1997) Anterior pituitary hypoplasia and dwarfism in mice lacking the dopamine transporter. *Neuron* 19: 127–138.
66. Cyr M, Caron MG, Johnson GA, Laakso A (2005) Magnetic resonance imaging at microscopic resolution reveals subtle morphological changes in a mouse model of dopaminergic hyperfunction. *NeuroImage* 26: 83–90.
67. Drobyshevsky A, Song S-K, Gamkrelidze G, Wyrwicz AM, Derrick M, et al. (2005) Developmental Changes in Diffusion Anisotropy Coincide with Immature Oligodendrocyte Progression and Maturation of Compound Action Potential. *J Neurosci* 25: 5988–5997.
68. Wiesmann U, Clark C, Symms M, Franconi F, Barker G, et al. (1999) Reduced anisotropy of water diffusion in structural cerebral abnormalities demonstrated with diffusion tensor imaging. *MAGNETIC RESONANCE IMAGING* 17: 1269–1274.
69. Carr DB, Sesack SR (2000) Projections from the Rat Prefrontal Cortex to the Ventral Tegmental Area: Target Specificity in the Synaptic Associations with Mesocortical and Mesocortical Neurons. *J Neurosci* 20: 3864–3873.
70. Ongur D, Price JL (2000) The Organization of Networks within the Orbital and Medial Prefrontal Cortex of Rats, Monkeys and Humans. *Cerebral Cortex* 10: 206–219.
71. Paxinos G (2004) *The Rat Nervous System*. Sydney: Academic Press.
72. Gabbott PLA, Warner TA, Jays PRL, Salway P, Busby SJ (2005) Prefrontal cortex in the rat: Projections to subcortical autonomic, motor, and limbic centers. *The Journal of Comparative Neurology* 492: 145–177.
73. Silva AC, Lee JH, Aoki I, Koretsky AP (2004) Manganese-enhanced magnetic resonance imaging (MEMRI): methodological and practical considerations. *NMR in Biomedicine* 17: 532–543.
74. Murayama Y, Weber B, Saleem KS, Augath M, Logothetis NK (2006) Tracing neural circuits in vivo with Mn-enhanced MRI. *Magnetic Resonance Imaging* 24: 349–358.
75. Van der Linden A, Van Camp N, Ramos-Cabrera P, Hoch M (2007) Current status of functional MRI on small animals: application to physiology, pathophysiology, and cognition. *NMR in Biomedicine* 20: 522–545.
76. Drapeau P, Nachshen DA (1984) Manganese Fluxes and Manganese-Dependent Neurotransmitter Release in Presynaptic Nerve-Endings Isolated From Rat-Brain. *Journal of Physiology-London* 348: 493–510.
77. Narita K, Kawasaki F, Kita H (1990) Mn and Mg influxes through Ca channels of motor nerve terminals are prevented by verapamil in frogs. *Brain Res* 510: 289–295.
78. Aoki I, Tanaka C, Takegami T, Ebisu T, Umeda M, et al. (2002) Dynamic activity-induced manganese-dependent contrast magnetic resonance imaging (DAIM MRI). *Magnetic Resonance in Medicine* 48: 927–933.
79. Broman J, Rinvik E, Sasso-Pognetto M, Shandiz KH, Ottersen OP (2004) Glutamate. In: Paxinos G, ed. *The Rat Nervous System* 3rd Ed. Sydney: Elsevier Academic Press. pp 1269–1292.
80. Rodriguiz RM, Chu R, Caron MG, Wetsel WC (2004) Aberrant responses in social interaction of dopamine transporter knockout mice. *Behavioural Brain Research* 148: 185–198.
81. John CE, Jones SR (2006) Exocytotic release of dopamine in ventral tegmental area slices from C57BL/6 and dopamine transporter knockout mice. *Neurochemistry International* 49: 737–745.
82. Mundorf ML, Joseph JD, Austin CM, Caron MG, Wightman RM (2001) Catecholamine release and uptake in the mouse prefrontal cortex. *Journal of Neurochemistry* 79: 130–142.
83. Sora I, Hall FS, Andrews AM, Itokawa M, Li XF, et al. (2001) Molecular mechanisms of cocaine reward: Combined dopamine and serotonin transporter knockouts eliminate cocaine place preference. *Proceedings of the National Academy of Sciences of the United States of America* 98: 5300–5305.
84. Zhuang XX, Oosting RS, Jones SR, Gainetdinov RR, Miller GW, et al. (2001) Hyperactivity and impaired response habituation in hyperdopaminergic mice. *Proc Natl Acad Sci U S A* 98: 1982–1987.
85. Drago J, Padungchaichot P, Accili D, Fuchs S (1998) Dopamine receptors and dopamine transporter in brain function and addictive behaviors: Insights from targeted mouse mutants. *Developmental Neuroscience* 20: 188–203.
86. Kida S, Pantazis A, Weller RO (1993) CSF drains directly from the subarachnoid space into nasal lymphatics in the rat. *Anatomy, histology, and immunological significance*. *Neuropathology and Applied Neurobiology* 19: 480–488.
87. Watanabe T, Michaelis T, Frahm J (2001) Mapping of Retinal Projections in the Living Rat Using High-Resolution 3D Gradient-Echo MRI with Mn<sup>2+</sup>-Induced Contrast. *Magn Reson in Med* 46: 424–429.
88. Elluru RG, Bloom GS, Brady ST (1995) Fast Axonal-Transport of Kinesin in the Rat Visual-System - Functionality of Kinesin Heavy-Chain Isoforms. *Molecular Biology of the Cell* 6: 21–40.
89. Chan KC, Fu Q-J, Hui ES, So K-f, Wu EX (2008) Evaluation of the retina and optic nerve in a rat model of chronic glaucoma using in vivo manganese-enhanced magnetic resonance imaging. *NeuroImage* 40: 1166–1174.
90. Satpute-Krishnan P, DeGiorgis JA, Conley MP, Jang M, Bearer EL (2006) A peptide zipcode sufficient for anterograde transport within amyloid precursor protein. *Proc Natl Acad Sci U S A* 103: 16532–16537.
91. Kalivas PW (2004) Glutamate systems in cocaine addiction. *Current Opinion in Pharmacology* 4: 23–29.
92. Thanos PK, Michaelides M, Benveniste H, Wang GJ, Volkow ND (2008) The effects of cocaine on regional brain glucose metabolism is attenuated in dopamine transporter knockout mice. *Synapse* 62: 319–324.
93. Gainetdinov RR, Caron MG (2003) Monoamine transporters: From genes to behavior. *Annual Review of Pharmacology and Toxicology* 43: 261–284.
94. Kalisch R, Salome N, Platzer S, Wigger A, Czisch M, et al. (2004) High trait anxiety and hyporeactivity to stress of the dorsomedial prefrontal cortex: a combined pHMRI and Fos study in rats. *NeuroImage* 23: 382–391.
95. Yavich L, Forsberg MM, Karaviorgou M, Gogos JA, Mannisto PT (2007) Site-Specific Role of Catechol-O-Methyltransferase in Dopamine Overflow within Prefrontal Cortex and Dorsal Striatum. *J Neurosci* 27: 10196–10209.
96. Brenhouse HC, Sonntag KC, Andersen SL (2008) Transient D1 Dopamine Receptor Expression on Prefrontal Cortex Projection Neurons: Relationship to Enhanced Motivational Salience of Drug Cues in Adolescence. *J Neurosci* 28: 2375–2382.
97. Goncalves L, Nogueira MI, Shammah-Lagnado SJ, Metzger M (2009) Prefrontal afferents to the dorsal raphe nucleus in the rat. *Brain Research Bulletin* 78: 240–247.
98. Pautler RG, Mongeau R, Jacobs RE (2003) In vivo trans-synaptic tract tracing from the murine striatum and amygdala utilizing manganese enhanced MRI (MEMRI). *Magnetic Resonance in Medicine* 50: 33–39.
99. Gainetdinov RR, Caron MC (2001) Genetics of childhood disorders: XXIV. ADHD, part 8: Hyperdopaminergic mice as an animal model of ADHD. *Journal of the American Academy of Child and Adolescent Psychiatry* 40: 380–382.
100. Shen HW, Hagino Y, Kobayashi H, Shinohara-Tanaka K, Ikeda K, et al. (2004) Regional differences in extracellular dopamine and serotonin assessed by in vivo microdialysis in mice lacking dopamine and/or serotonin transporters. *Neuropsychopharmacology* 29: 1790–1799.
101. Trinh JV, Nehrenberg DL, Jacobsen JPR, Caron MG, Wetsel WC (2003) Differential psychostimulant-induced activation of neural circuits in dopamine transporter knockout and wild type mice. *Neuroscience* 118: 297–310.
102. Ralph RJ, Paulus MP, Fumagalli F, Caron MG, Geyer MA (2001) Prepulse inhibition deficits and perseverative motor patterns in dopamine transporter knock-out mice: Differential effects of D1 and D2 receptor antagonists. *Journal of Neuroscience* 21: 305–313.
103. Giros B, Jaber M, Jones SR, Wightman RM, Caron MG (1996) Hyperlocomotion and indifference to cocaine and amphetamine in mice lacking the dopamine transporter. *Nature* 379: 606–612.
104. Sora I, Wichems C, Takahashi N, Li XF, Zeng ZZ, et al. (1998) Cocaine reward models: Conditioned place preference can be established in dopamine- and serotonin-transporter knockout mice. *Proceedings of the National Academy of Sciences of the United States of America* 95: 7699–7704.
105. Gainetdinov RR, Wetsel WC, Jones SR, Levin ED, Jaber M, et al. (1999) Role of serotonin in the paradoxical calming effect of psychostimulants on hyperactivity. *Science* 283: 397–401.
106. Yamashita M, Fukushima S, Shen HW, Hall FS, Uhl GR, et al. (2006) Norepinephrine transporter blockade can normalize the prepulse inhibition deficits found in dopamine transporter knockout mice. *Neuropsychopharmacology* 31: 2132–2139.
107. Bearer EL, Zhang X, Jacobs RE (2007) Live imaging of neuronal connections by magnetic resonance: Robust transport in the hippocampal-septal memory circuit in a mouse model of Down syndrome. *NeuroImage* 37: 230–242.
108. Paxinos G, Franklin K (2001) *The Mouse Brain in Stereotaxic Coordinates*. San Diego: Academic Press. 296 p.
109. Hennig J, Nauerth A, Friedburg H (1986) Rare imaging - a fast imaging method for clinical MR. *MagnResonMed* 3: 823–833.
110. Bottomley PA (1987) Spatial localization in NMR spectroscopy in vivo. *Ann NY Acad Sci* 508: 333–348.
111. Tkáč B, Staručk Z, Choi I-Y, Gruetter R (1999) In Vivo 1H NMR Spectroscopy of Rat Brain at 1ms Echo Time. *Magnetic Resonance in Medicine* 41: 649–656.
112. Gruetter R (1993) Automatic, Localized In Vivo Adjustment of All 1st-Order and 2nd-Order Shim Coils. *Magnetic Resonance in Medicine* 29: 804–811.
113. Hasan KM, Basser PJ, Parker DL, Alexander AL (2001) Analytical computation of the eigenvalues and eigenvectors in dt-mri. *J Magn Reson* 152: 41–47.
114. Shattuck DW, Leahy RM (2001) Automated graph-based analysis and correction of cortical volume topology. *IEEE Trans Med Imaging* 20: 1167–1177.
115. Sled JG, Zijdenbos AP, Evans AC (1998) A nonparametric method for automatic correction of intensity nonuniformity in MRI data. *IEEE Trans Med Imaging* 17: 87–97.

116. Madabhushi A, Udupa JK (2005) Interplay between intensity standardization and inhomogeneity correction in MR image processing. *Medical Imaging, IEEE Transactions on* 24: 561–576.
117. Kovacevic N, Henderson JT, Chan E, Lifshitz N, Bishop J, et al. (2005) A Three-dimensional MRI Atlas of the Mouse Brain with Estimates of the Average and Variability. *Cereb Cortex* 15: 639–645.
118. Kochunov P, Lancaster JL, Thompson P, Woods R, Mazziotta J, et al. (2001) Regional spatial normalization: Toward an optimal target. *Journal of Computer Assisted Tomography* 25: 805–816.
119. Hof PR, Bloom FE, Belichenko PV, Celio MR (2000) *Comparative Cytoarchitectonic Atlas of the C57bl/6 and 129/SV Mouse Brains*. New York: Elsevier.
120. Dong HW (2008) *Allen Reference Atlas - A Digital Color Brain Atlas of the C57Black/6J Male Mouse*. Hoboken, NJ: John Wiley & Sons, Inc. 366 p.
121. Lepore N, Brun C, Yi-Yu C, Ming-Chang C, Dutton RA, et al. (2008) Generalized Tensor-Based Morphometry of HIV/AIDS Using Multivariate Statistics on Deformation Tensors. *Medical Imaging, IEEE Transactions on* 27: 129–141.
122. Spring S, Lerch JP, Henkelman RM (2007) Sexual dimorphism revealed in the structure of the mouse brain using three-dimensional magnetic resonance imaging. *Neuroimage* 35: 1424–1433.
123. Ma Y, Hof PR, Grant SC, Blackband SJ, Bennett R, et al. (2005) A three-dimensional digital atlas database of the adult C57BL/6J mouse brain by magnetic resonance microscopy. *Neuroscience* 135: 1203–1215.
124. Ratiney H, Sdika M, Coenradic Y, Cavassila S, van Ormondt D, et al. (2005) Time-Domain Semi-Parametric Estimation Based on a Metabolite Basis Set. *NMR Biomed* 18: 1–13.
125. Naressi A, Couturier C, Devos J, Janssen M, Mangeat C, et al. (2001) Java-based graphical user interface for the MRUI quantitation package. *Magma* 12: 141–152.
126. Govindaraju V, Young K, Maudsley AA (2000) Proton NMR chemical shifts and coupling constants for brain metabolites. *NMR Biomed* 13: 129–153.
127. Mattiello J, Basser PJ, LeBihan D (1997) The b matrix in diffusion tensor echoplanar imaging. *MagnResonMed* 37: 292–300.
128. Rorden C, Brett M (2000) Stereotaxic display of brain lesions. *Behavioural Neurology* 12: 191–200.
